# Supplementary material
Source: PubMed Central journal article supplement (PMC2377018)
Supplement: NIHMS44436-supplement-Figure_S1.pdf [file NIHMS44436-supplement-Figure_S1.pdf]

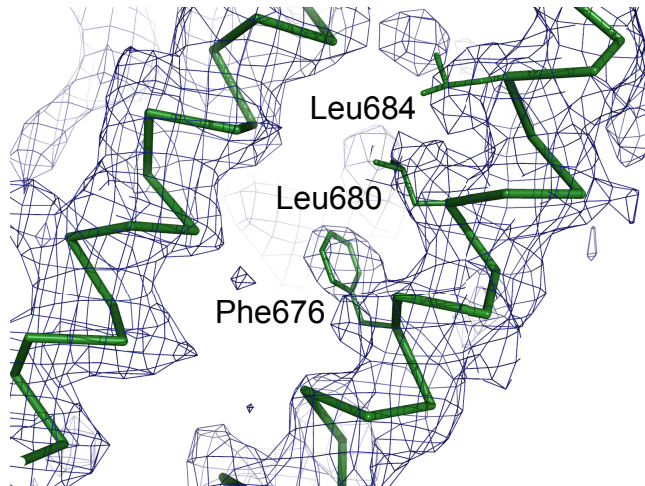

**Supplementary Figure 1** Fourier synthesis from density-modified MAD phases, contoured at  $1.0 \sigma$ . Backbone model of Alix V domain (green) is shown with selected residues in sticks.
